# Supplementary material for: The Role of Sch9 and the V-ATPase in the Adaptation Response to Acetic Acid and the Consequences for Growth and Chronological Lifespan
Source: MDPI journal article supplement (doi:10.3390/microorganisms9091871), 2021-09-03

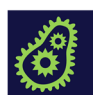

Supplementary figures

# The role of Sch9 and the V-ATPase in the adaptation response to acetic acid and the consequences for growth and chronological lifespan

Marie-Anne Deprez, Jeroen Maertens, Lisbeth Olssen, Maurizio Bettiga, Joris Winderickx

**Figure S1:** Passive diffusion of C14-labelled acetic acid into yeast cells. Cells expressing cytosolic pHluorin were grown to mid-log phase in medium without acetic acid. After a short starvation in buffer, 2 mM or 20 mM C<sup>14</sup>-labelled acetic acid was pulsed to the cells (0 min) and the uptake was monitored during 10 min. Results are shown with 90% confidence intervals in dotted lines. The data are given for the BY4741 WT strain (blue lines) and the isogenic mutant strains *sch9*Δ (green lines), *vma2*Δ (red lines) and *sch9*Δ*vma2*Δ (pink lines) as indicated.

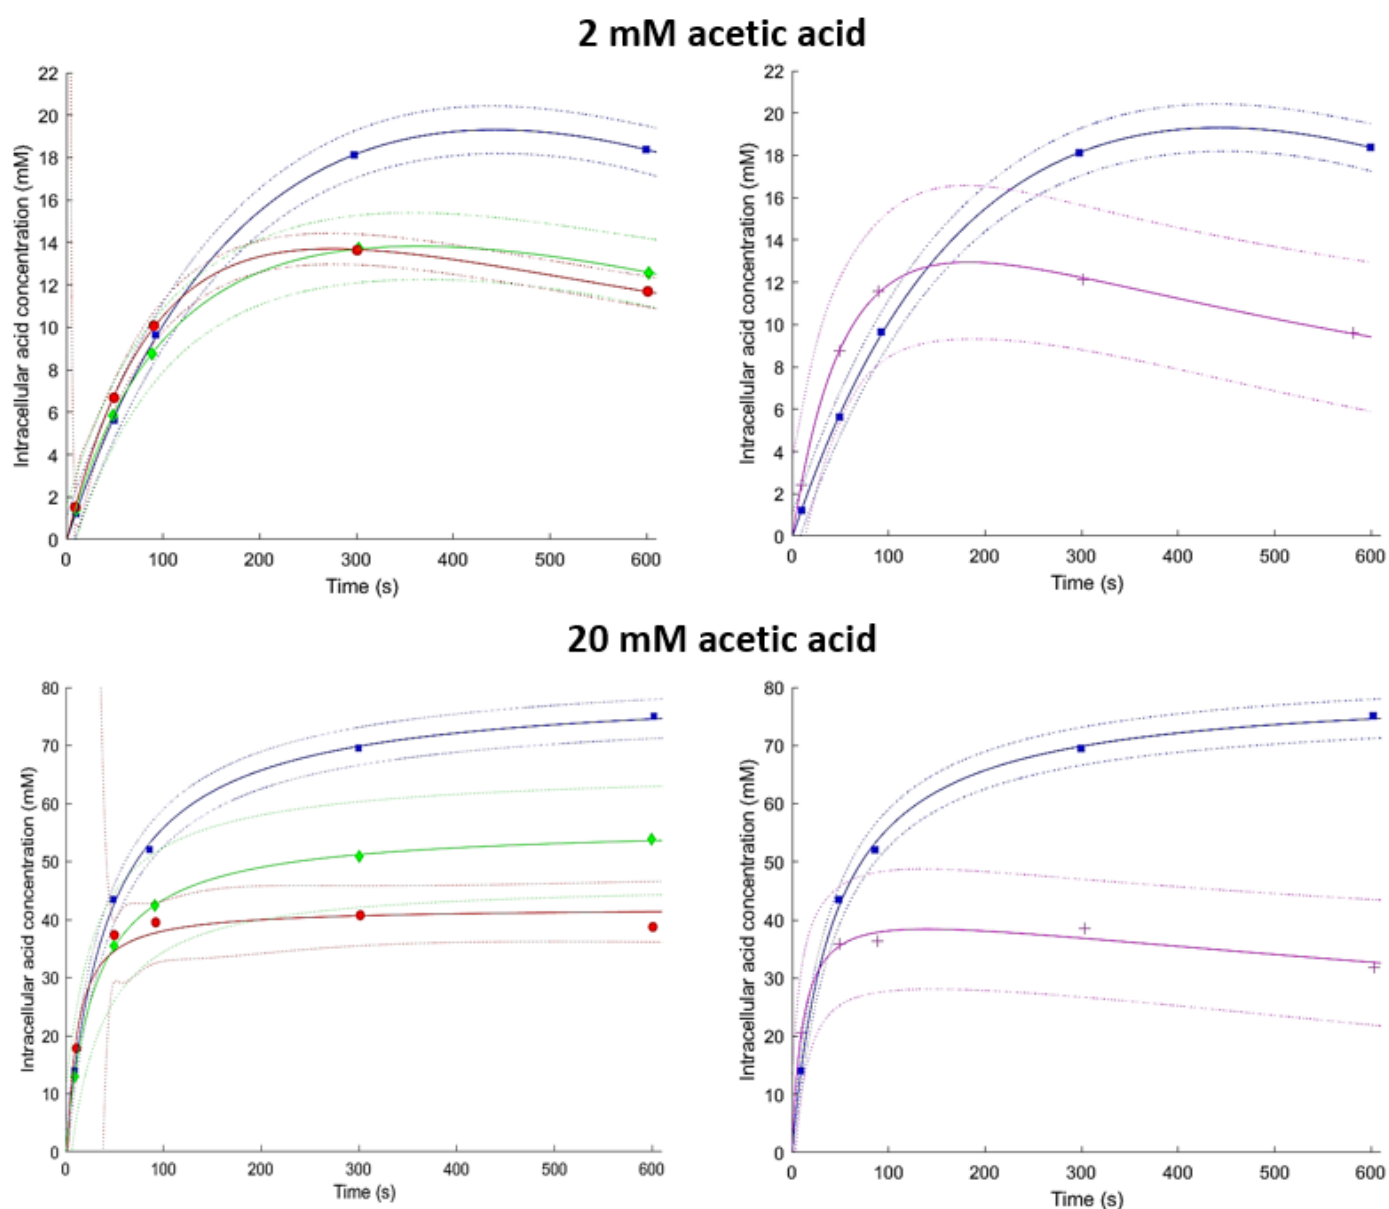

**Figure S2:** Average acetic acid uptake rate over time normalized to dry weight (dw). Results are shown with 95% confidence intervals in dotted lines. The data are given for the BY4741 WT strain (blue lines) and the isogenic mutant strains *sch9Δ* (green lines), *vma2Δ* (red lines) and *sch9Δvma2Δ* (ochre lines). The initial acetic acid uptake rate, as calculated during the first 10 seconds, was slightly higher in the *sch9Δ* strain when compared to the WT strain but this difference was not significant. In contrast, the enhanced initial uptake rates observed in the *vma2Δ* and the *sch9Δvma2Δ* strains were significantly different from the WT strain with 90% and 95% confidence, respectively.  $\sigma$ ; standard error of the mean.

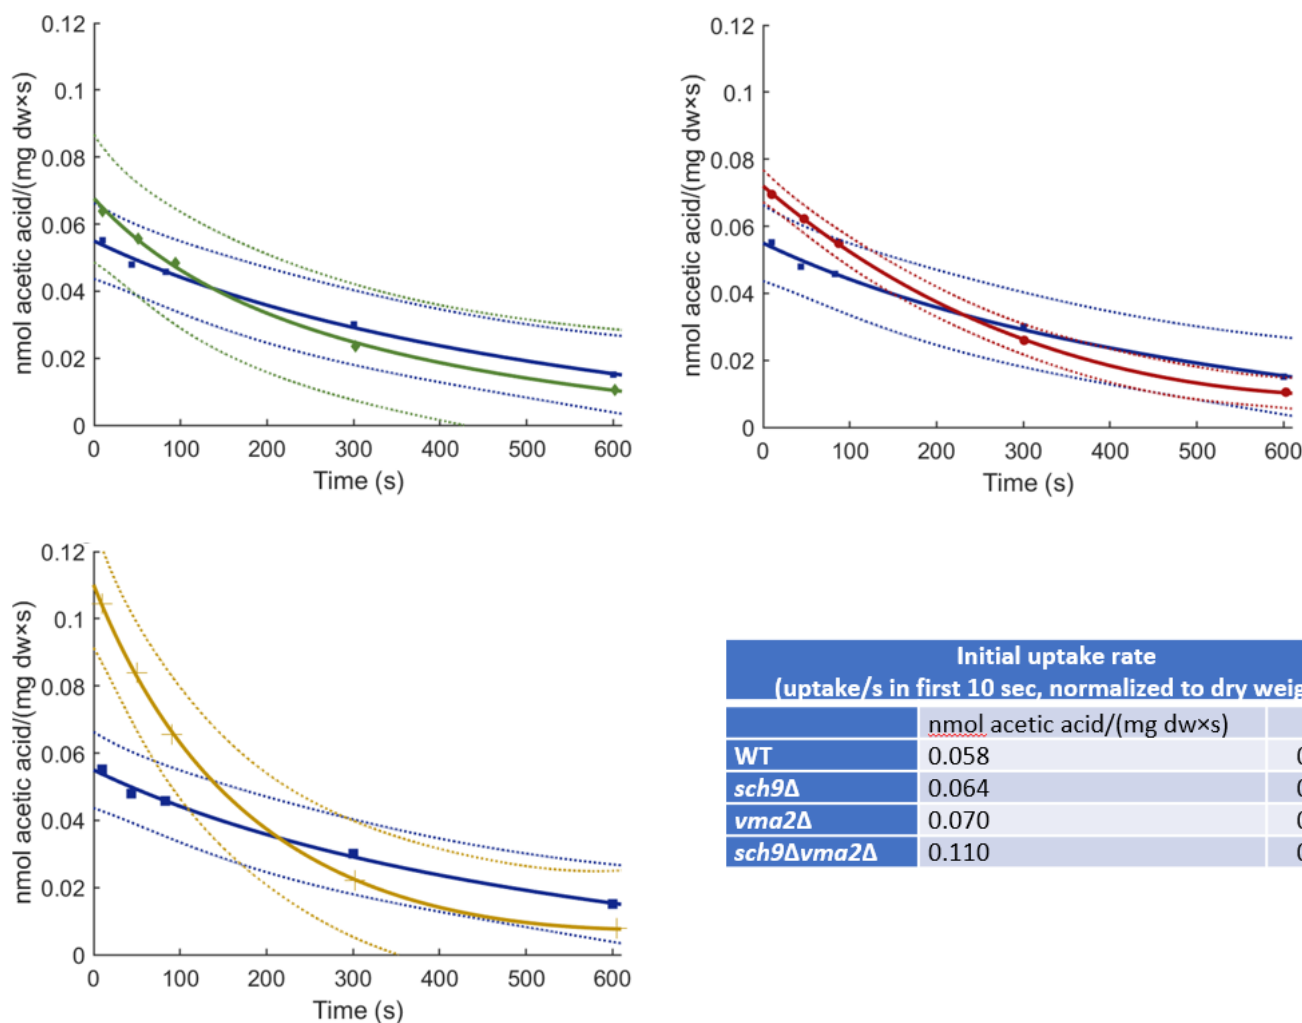

**Figure S3:** Addition of 20 and 150 mM of acetic acid induces a rapid acidification of the cytosol. Cells expressing cytosolic pHluorin were grown to mid-log phase in medium without acetic acid. After establishing the baseline cytosolic pH on growth medium, an equal volume of concentrated acetic acid was added to each culture to reach a final concentration of 0, 2, 20 or 150 mM acetic acid. The acetic acid pulse is indicated by the black arrow. Results are shown as mean  $\pm$  SD of 3 biological replicates (N = 3). The data are given for the BY4741 WT (blue), the *sch9* $\Delta$  (green), the *vma2* $\Delta$  (red), and the *sch9* $\Delta$ *vma2* $\Delta$  (ochre) strains as indicated.

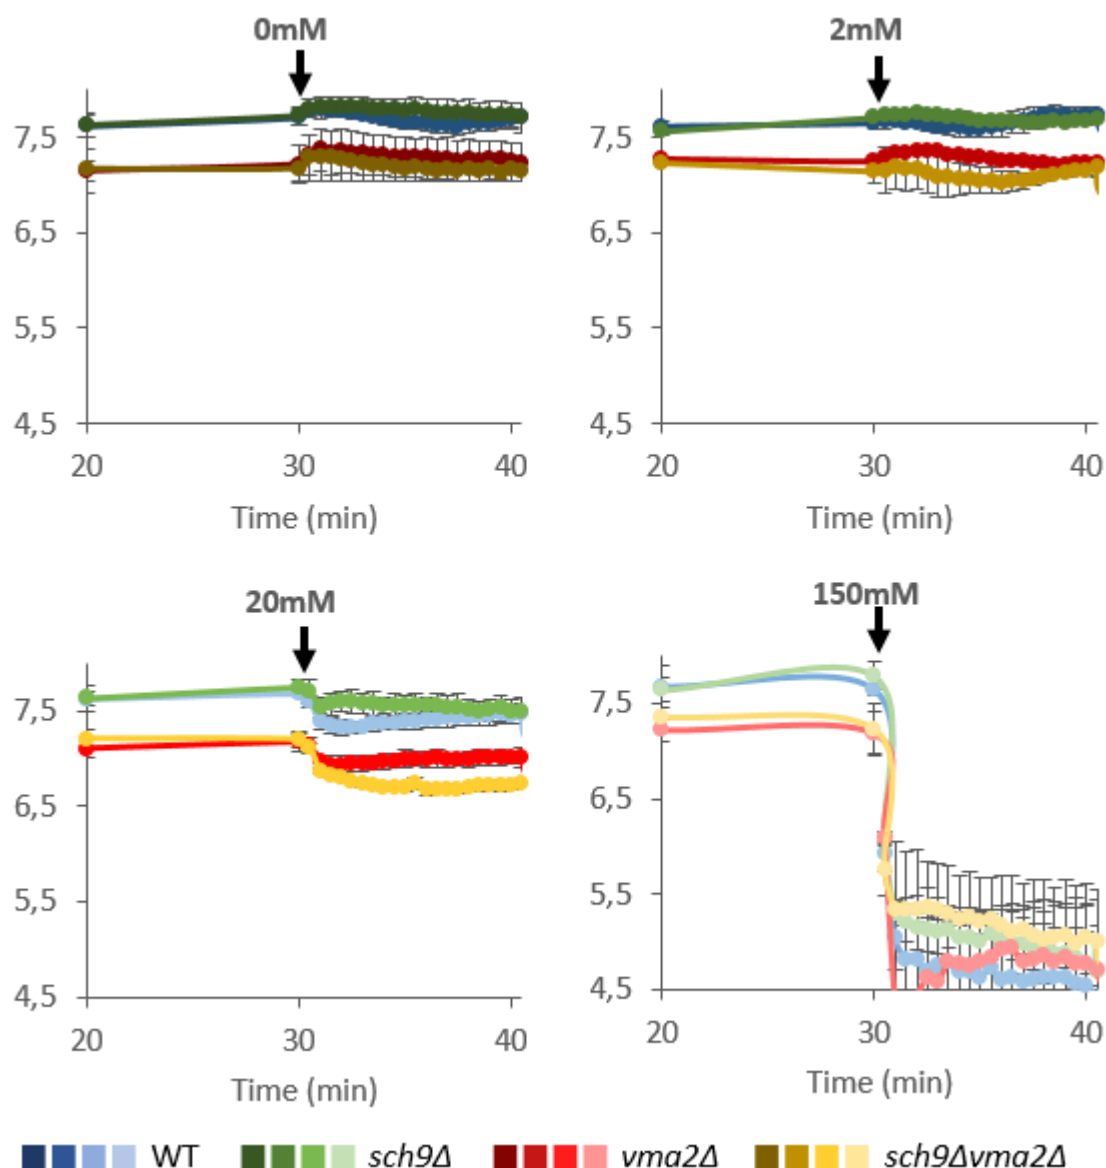

**Figure S4:** Overview of cell death and ROS accumulation in BY4741 WT, *sch9Δ*, *vma2Δ* and *sch9Δvma2Δ* cells during aging in the presence of acetic acid. Samples pre-grown on medium without acetic acid were diluted to OD<sub>600</sub> 0.1 in medium (pH 5) containing 0, 2, 20 or 150 mM acetic acid (HAc) on time point 0 (TP0). After 6, 24 and 48 hours or 6, 12, 16 and 20 days, samples were taken to assess lifespan and ROS accumulation using SYTOX™ green and DHE staining respectively.

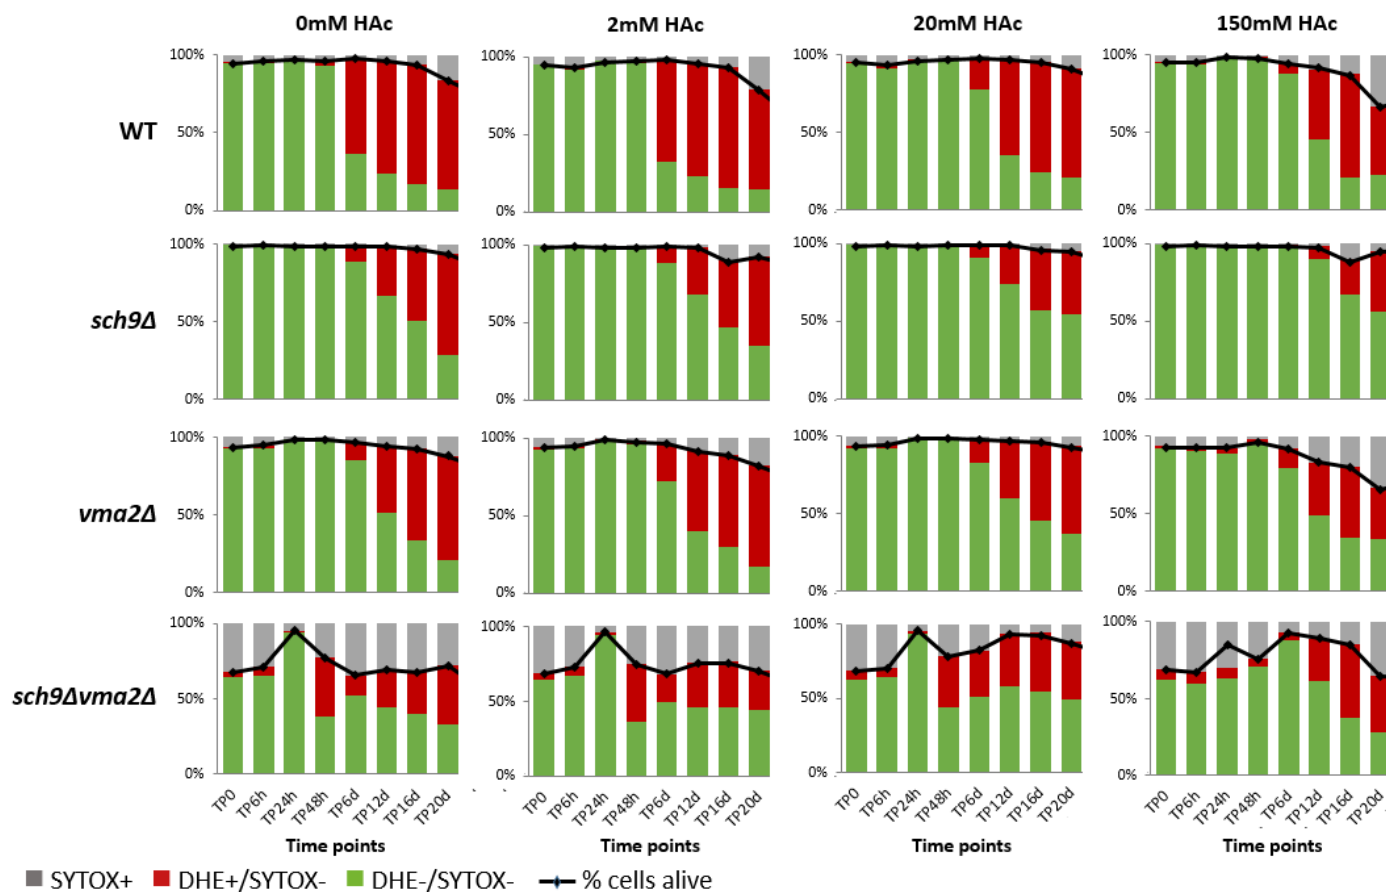

Supplement: s1 [file s1]
